# Supplementary material for: Pseudo-atomic-scale metals well-dispersed on nano-carbons as ultra-low metal loading oxygen-evolving electrocatalysts
Source: Royal Society of Chemistry journal article supplement (doi:10.1039/d0sc01348j), 2020-01-01
Supplement: d0sc01348j1.pdf [file d0sc01348j1.pdf]

## Supporting Information for

### **Pseudo-Atomic-Scale Metals Well-Dispersed on Nano-Carbons as Ultra-Low Metal Loading Oxygen-Evolving Electrocatalysts**

Jing-Fang Huang\* and Wei-Zhe Xie

Department of Chemistry, National Chung Hsing University, Taichung 402, Taiwan, R.O.C.

\*Correspondence to: E-mail: [jfh@dragon.nchu.edu.tw](mailto:jfh@dragon.nchu.edu.tw)

#### **This file includes:**

The area of single molecule of TA

Coverage of TA on GCE (one monolayer)

Coverage of TA on SWCNT (one monolayer)

pH-controllable TA molecule monolayer on the nano-carbon (NC)

UV-Vis of Fe<sup>2+</sup>-TA complex determines the Fe loading on the Fe@SWCNT

Figs. S1 to S16

Tables S1

## The area of single molecule of TA

The radius of a TA molecule was determined by measuring the length from its center (A) to one of end hydroxyl groups (B). The A-B length was measured to be *ca* 1.28 nm. Thus, the area of single-molecule of TA ( $A_{TA}$ ) is calculated as below.

$$A_{TA} = [2 \times (1.28 \times 10^{-9} \text{ m})]^2 = \text{ca } 7 \times 10^{-18} \text{ m}^2$$

## Coverage of TA on GCE (one monolayer)

The surface area of GCE/ $A_{TA} = 7 \times 10^{-6} \text{ m}^2 / 7 \times 10^{-18} \text{ m}^2$

$$= \sim 1 \times 10^{12} \text{ molecules/GCE}$$

$$= \sim 1.66 \times 10^{-12} \text{ moles/GCE}$$

## Coverage of TA on SWCNT (one monolayer)

The Carbon loading  $15.1 \mu\text{g cm}^{-2}$  is drop-dried on a GCE ( $0.07 \text{ cm}^2$ )

→  $1.06 \mu\text{g}$  SWCNT on the GCE and the BET SWCNT specific surface area is about  $525 \text{ m}^2 \text{ g}^{-1}$

$$\Rightarrow \text{Total surface area of SWCNT on the GCE} = 1.06 \times 10^{-6} \times 525 = 5.6 \times 10^{-4} \text{ m}^2$$

Coverage of TA on SWCNT (one monolayer):

Total surface area of SWCNT on GCE/  $A_{TA} = 5.6 \times 10^{-4} \text{ m}^2 / 7 \times 10^{-18} \text{ m}^2$

$$= \sim 8.1 \times 10^{13} \text{ molecules/GCE}$$

$$= \sim 1.33 \times 10^{-10} \text{ moles/GCE}$$

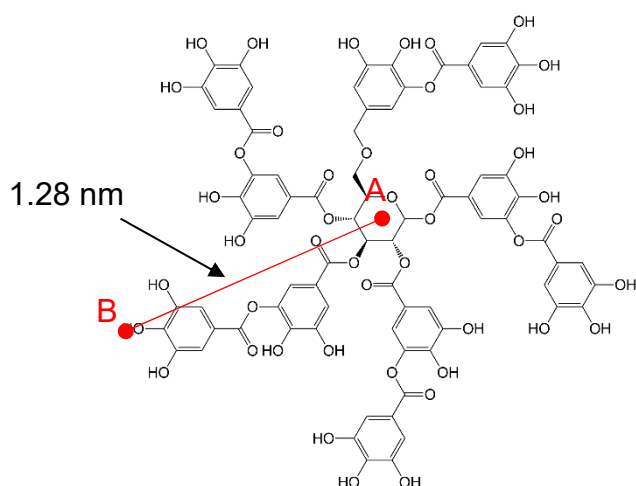

**Fig. S1.** Molecule structure of TA

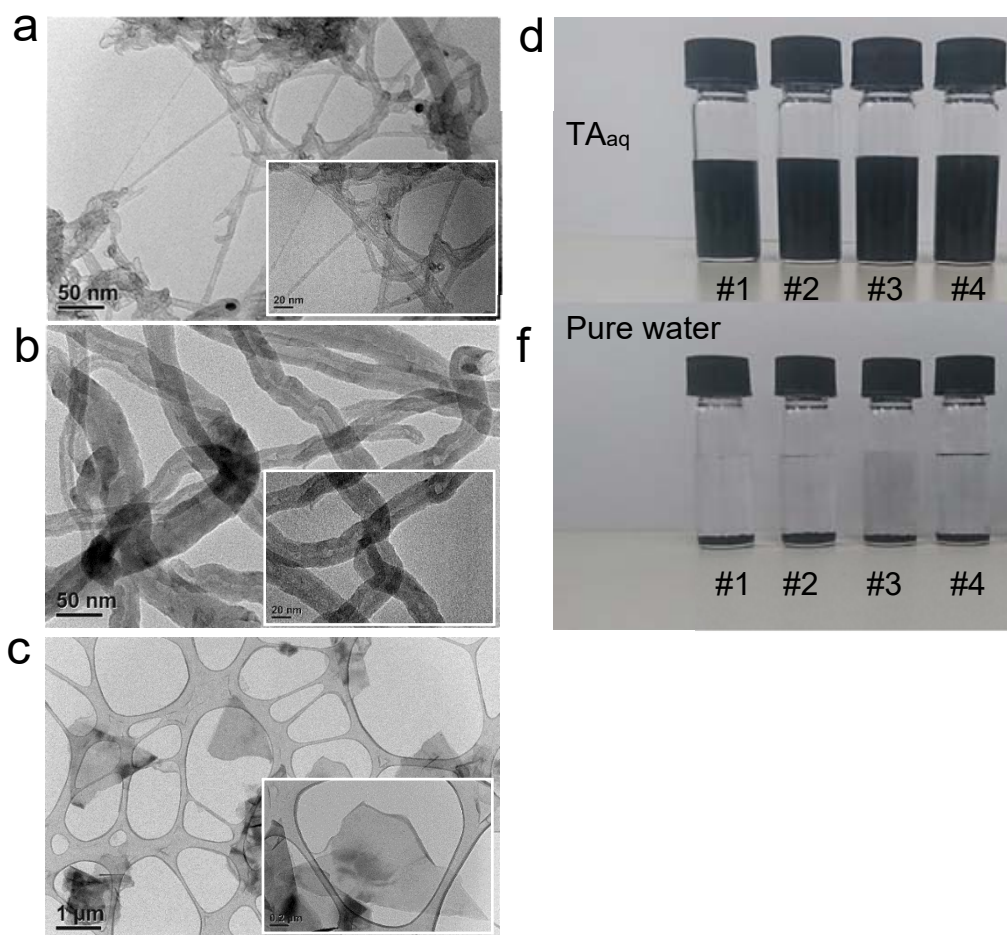

**Fig. S2** TEM images of well-dispersed (a) TA-SWCNT, (b) TA-MWCNT, and (c) TA-GE8; Photographs of vials containing 0.12 wt% NCs, including #1 SWCNT, #2 MWCNT, #3 GE8, and #4 GE12 in (d) 0.12 wt% TA aqueous solution and (e) pure water, respectively.

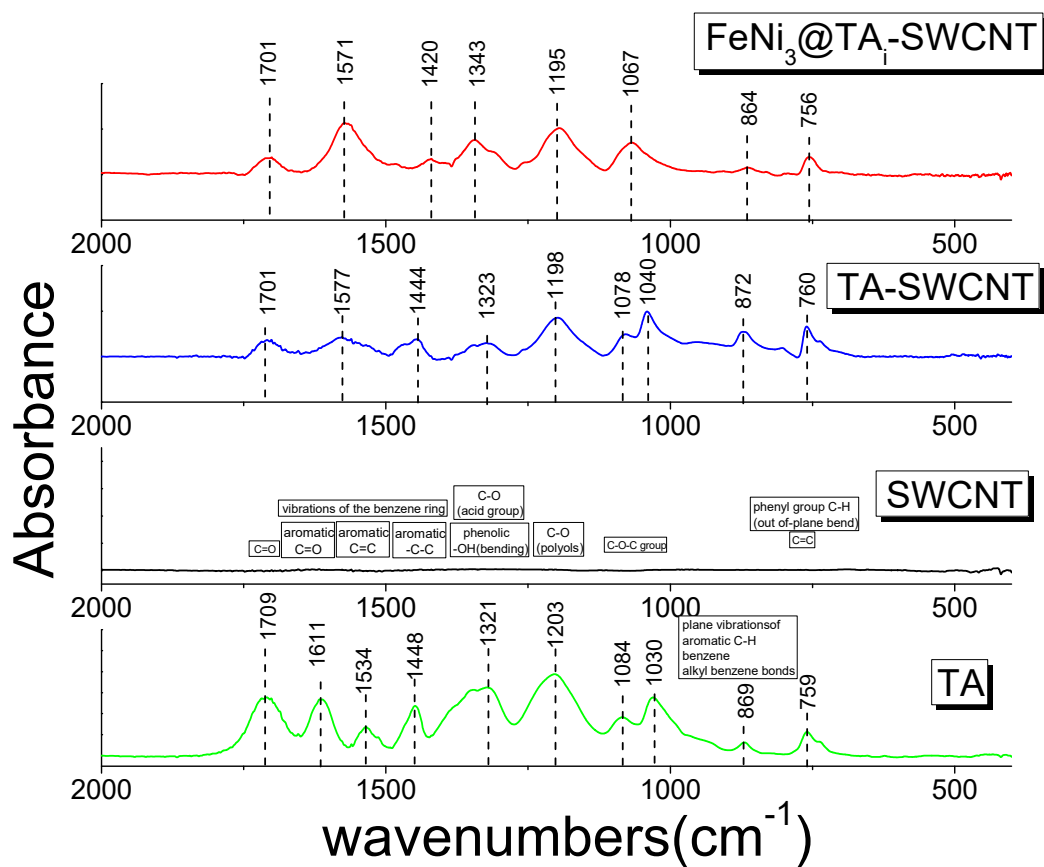

**Fig. S3** FTIR spectra of  $\text{FeNi}_3@TA_i\text{-SWCNT}$ ,  $TA\text{-SWCNT}$ ,  $SWCNT$ , and  $TA$ .

### pH-controllable TA molecule monolayer on the nano-carbon (NC)

TA<sub>ad</sub> on NCs also can be evaluated by CVs recorded in KOH<sub>aq</sub> (Fig. S4), with TA<sub>ad</sub> on SWCNT serving as an example. In this case, 4  $\mu$ l of 0.027 wt% TA<sub>m</sub>-SWCNT<sub>aq</sub> (carbon loading 15.1  $\mu$ g cm<sup>-2</sup>) was drop-dried onto a GCE (0.07 cm<sup>2</sup>) (TA<sub>m</sub>-SWCNT@GCE) serving as a working electrode. CVs of TA anodic stripping were recorded after various periods ( $t_{de}$ ) before the CV measurement in 1.0 M KOH<sub>aq</sub>. Anodic waves appear due to TA oxidation to TA-quinone through 2e<sup>-</sup>/2H<sup>+</sup> in the first cycle of CVs, then disappear in the second cycle of CVs, indicating TA anodic stripping from TA-SWCNT. The SWCNT specific surface area is  $\sim 525$  m<sup>2</sup> g<sup>-1</sup>, evaluated from nitrogen adsorption data calculated by the Brunauer-Emmett-Teller method, and is consistent with the data provided by the manufacturer (400–600 m<sup>2</sup> g<sup>-1</sup>). TA<sub>ad</sub> in one monolayer on SWCNT is  $\sim 8.1 \times 10^{13}$  molecules. The TA<sub>ad</sub> on the as-prepared TA<sub>m</sub>-SWCNT is  $\sim 12$  TA molecule layers, which is then reduced to 1–1.5 TA molecule layers after immersion in KOH<sub>aq</sub> for over 30 min (Fig. S4). These results demonstrate that pH-tunable TA monolayer formation occurs on NCs (TA<sub>i</sub>-NCs).

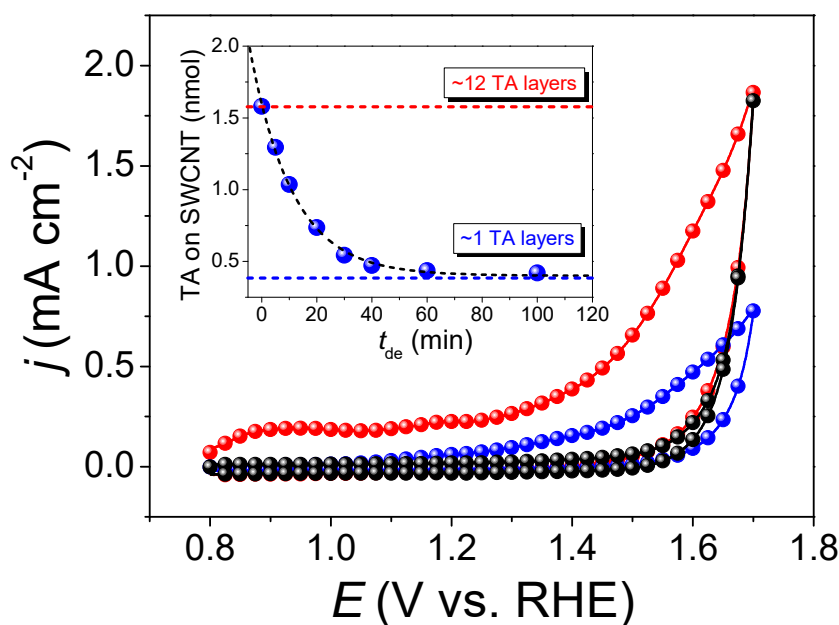

**Fig. S4** CVs of TA anodic stripping were recorded on (black solid circle) a GCE, (red solid circle) a TA<sub>m</sub>-SWCNT@GCE, and (blue solid circle) a TA<sub>m</sub>-SWCNT@GCE incubated in 1.0 M KOH<sub>aq</sub> for  $t_{de} = 20$  min before the CV measurement with a scan rate of 50 mV/s. Inset: TA<sub>ad</sub> on the TA-SWCNT vs.  $t_{de}$ .

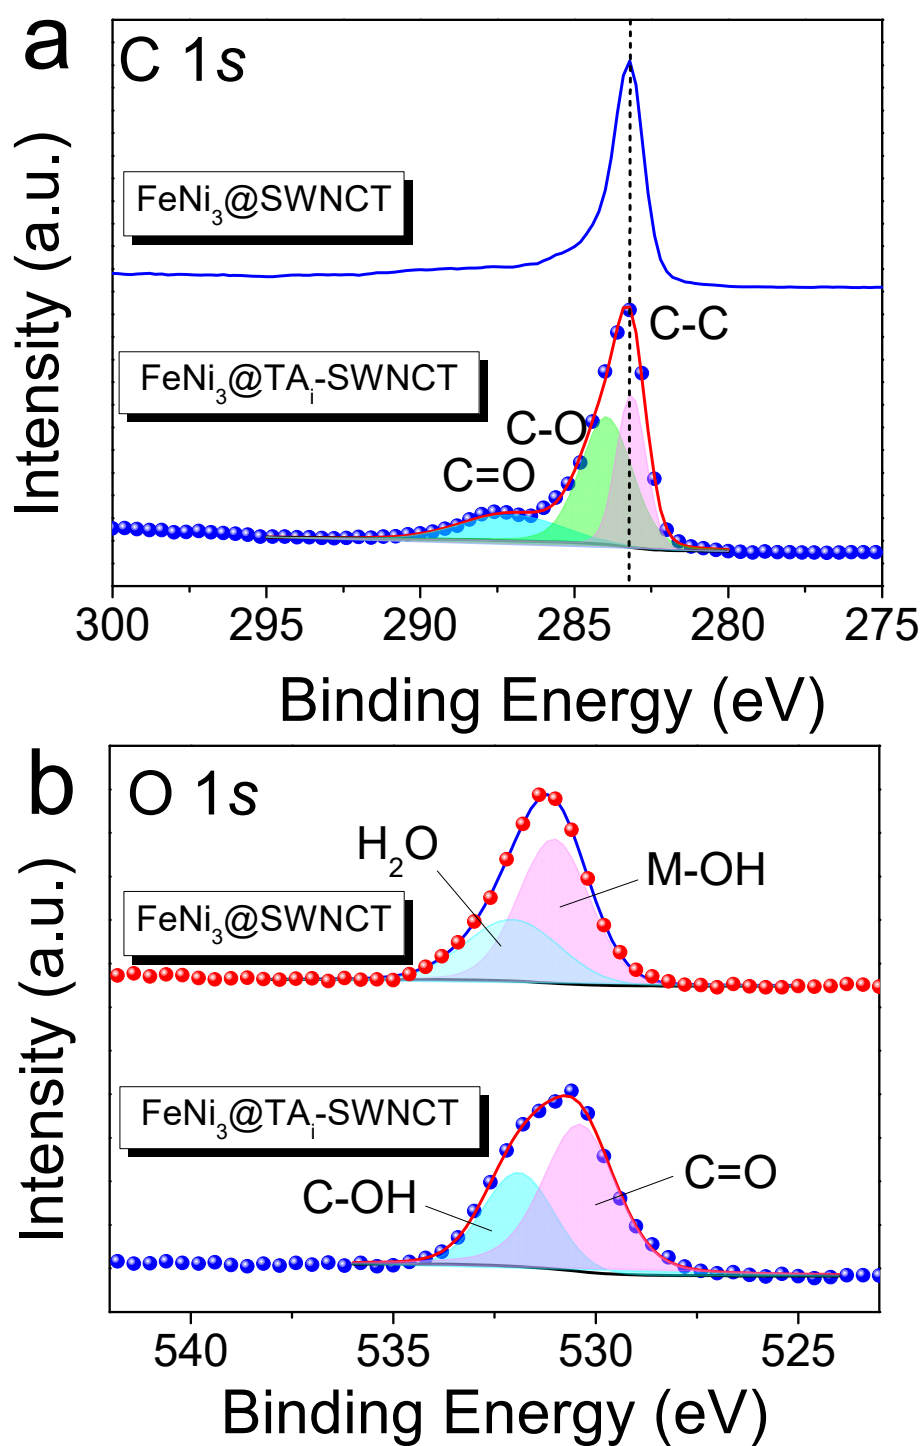

**Fig. S5** C 1s and O 1s spectra of the FeNi<sub>3</sub>@SWCNT and FeNi<sub>3</sub>@TA<sub>i</sub>-SWCNT.

### UV-Vis of Fe<sup>2+</sup>-TA complex determines the Fe loading on the Fe@SWCNT

Two peaks of TA were observed at 218 and 275 nm, which correspond to the  $\pi$ - $\pi^*$  and  $n$ - $\pi^*$  transitions of TA, respectively (Fig. S6a). After the addition of Fe<sup>2+</sup>, other peaks appeared at 317 and 550 nm. The peak at 317 nm was assigned to the TA absorption peaks coordinated to the Fe<sup>2+</sup>, and the broad peak near 550 nm corresponds to a coordinated TA to Fe<sup>2+</sup>-charge transfer band in the Fe<sup>2+</sup>-TA complex. In the UV-Vis spectra, the absorbance at 550 nm ( $A_{550}$ ) is dependent on the concentration of the Fe<sup>2+</sup>-TA complex (Fig. S6b). The Fe loading on the Fe@SWCNT was determined by tracking the reduction in  $A_{550}$  after SWCNT adsorption (Fig. S7).

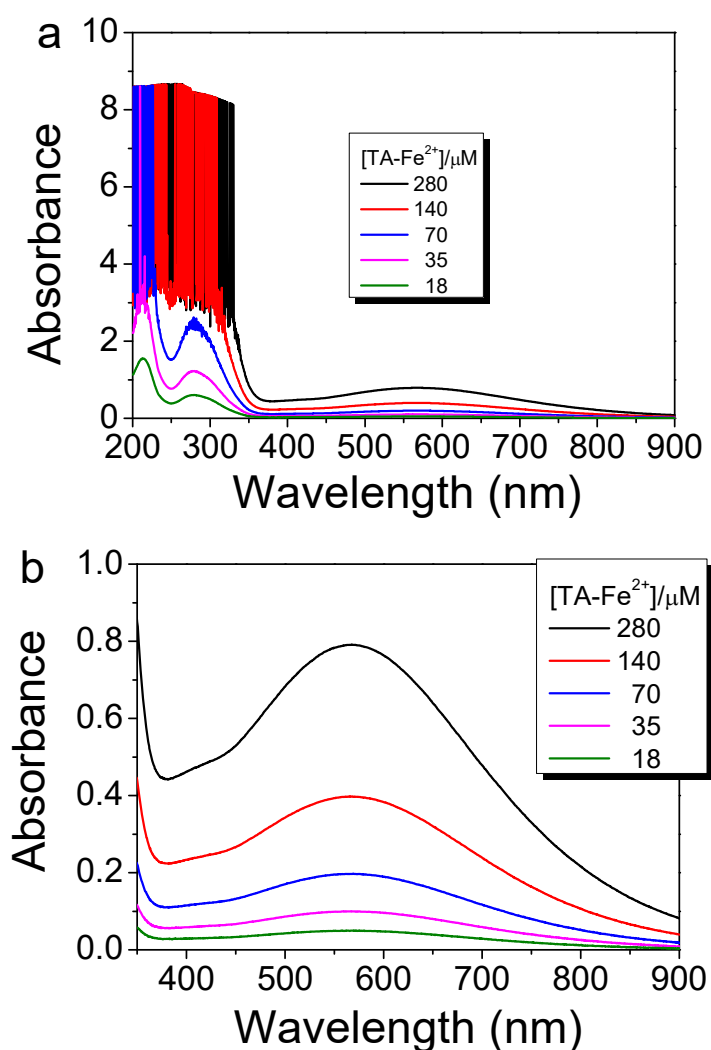

**Fig. S6** UV-Vis absorption spectra a) 200–900 nm and b) 350–900 nm recorded in various of [TA-Fe<sup>2+</sup>].

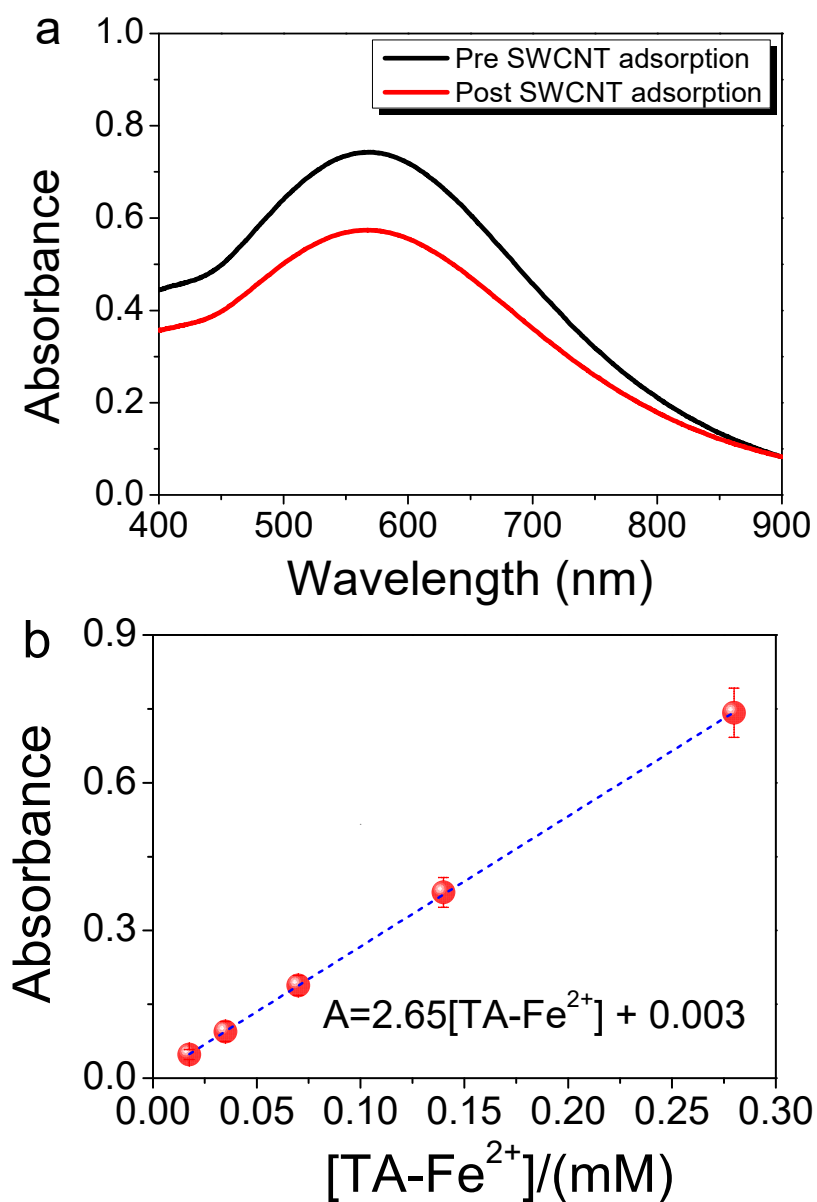

**Fig. S7** (a) Tracking the reduction in  $A_{550}$  before and after SWCNT adsorption in  $TA-Fe^{2+}$ -complex-containing aqueous solution. (b) Calibration curve was recorded as  $A_{550}$  vs.  $[TA-Fe^{2+}]$ .



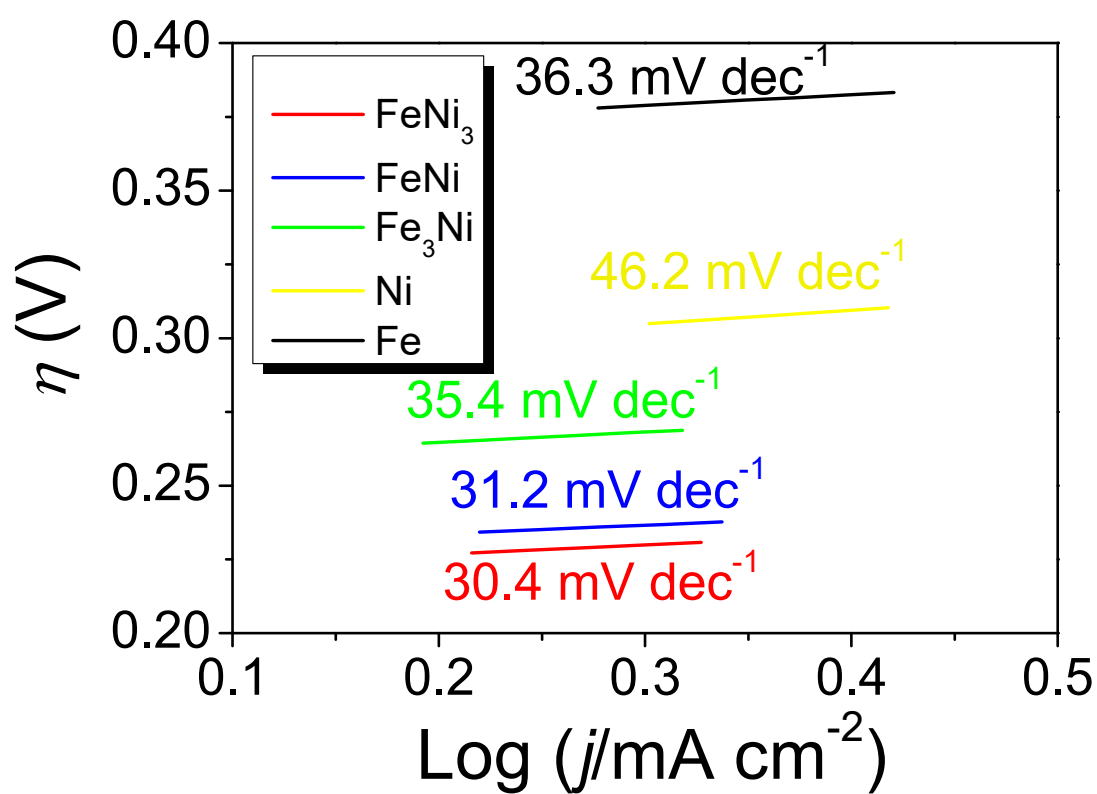

**Fig. S8** Tafel plots are transferred from the data shown in Fig. 6a.

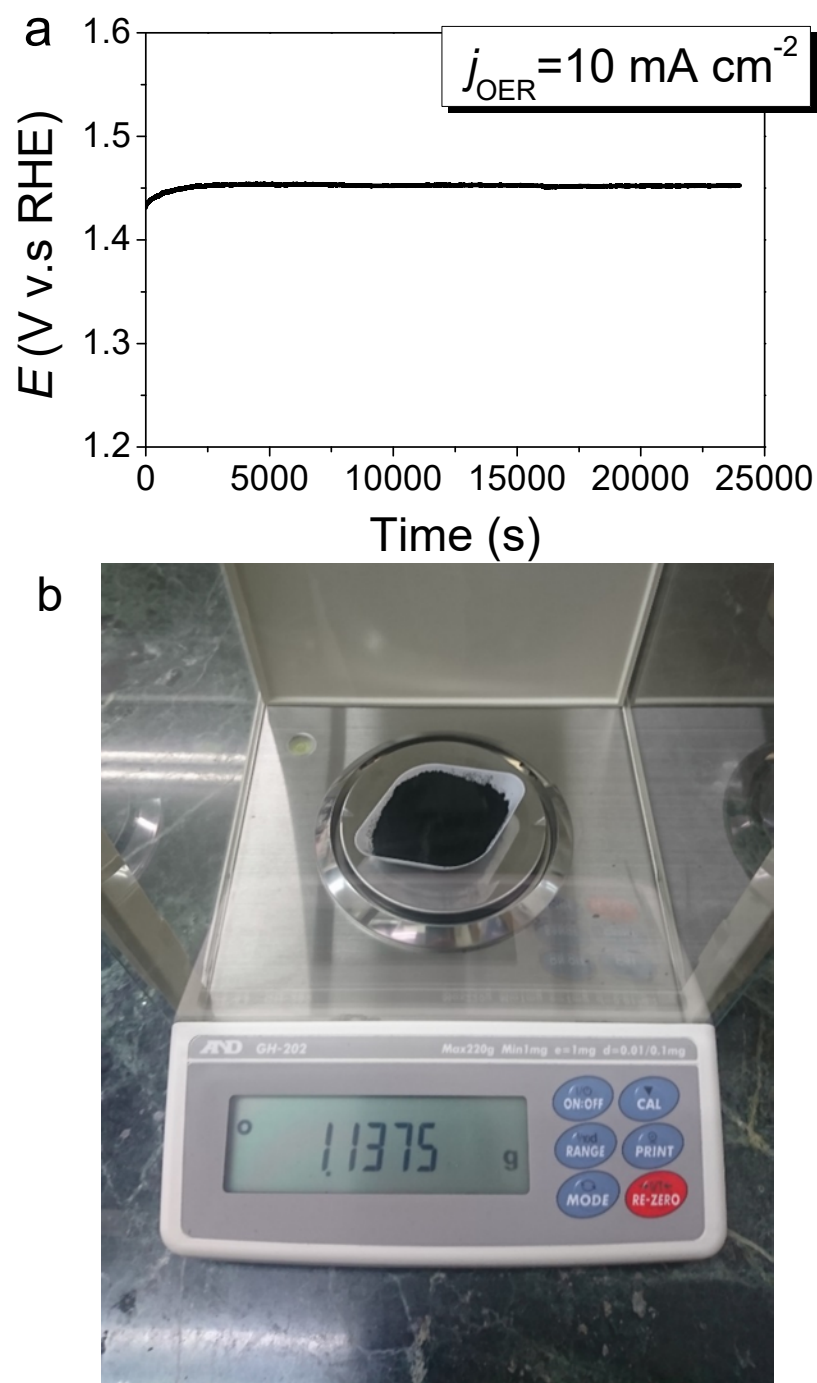

**Fig. S9** (a) Chronopotentiometry curves at a current density of  $10 \text{ mA cm}^{-2}$  and (b) gram-scale production of  $\text{FeNi}_3\text{@SWCNT}$ .

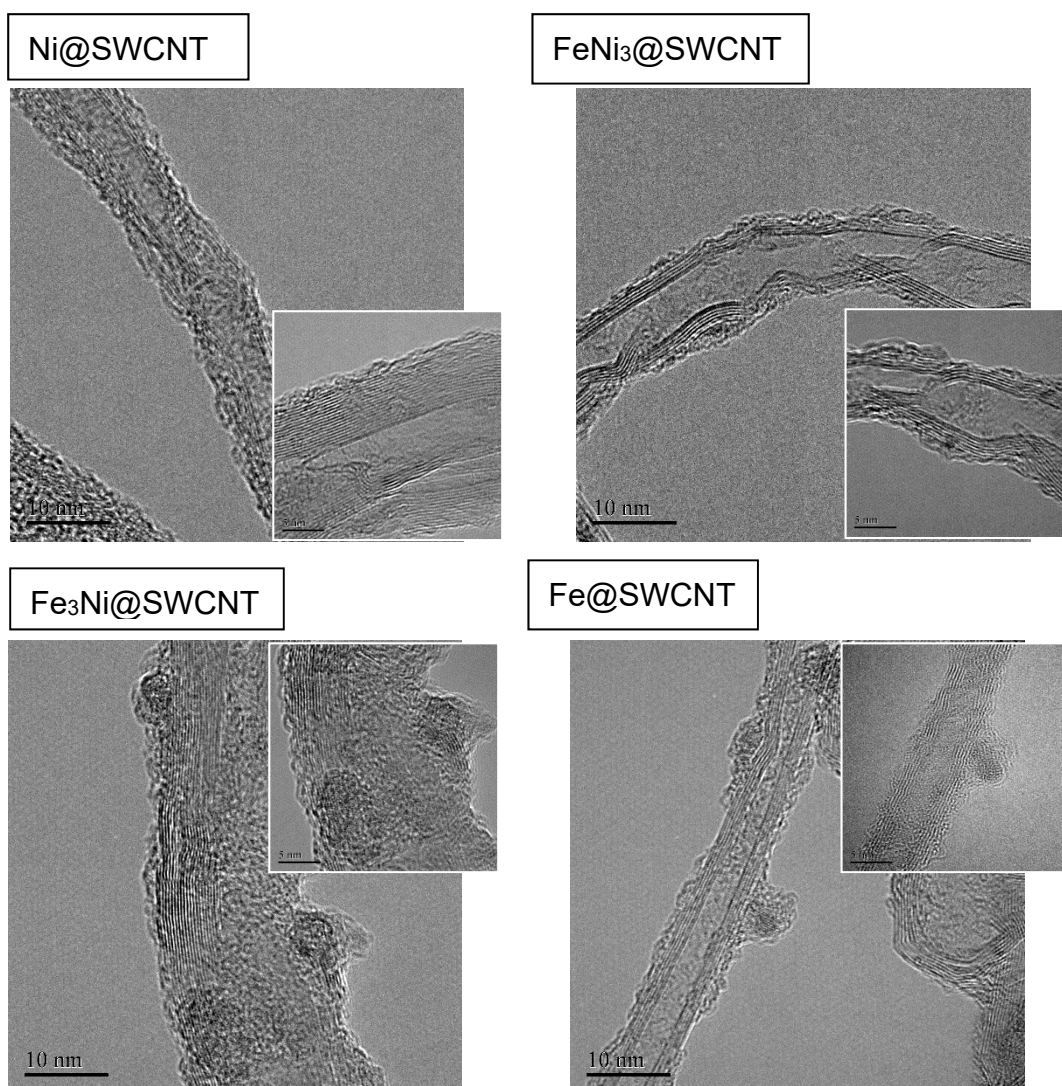

**Fig. S10** HR-TEM images of  $(\text{FeNi})_x\text{@SWCNT}$  including  $\text{Ni@SWCNT}$ ,  $\text{FeNi}_3\text{@SWCNT}$ ,  $\text{Fe}_3\text{Ni@SWCNT}$ , and  $\text{Fe@SWCNT}$ .

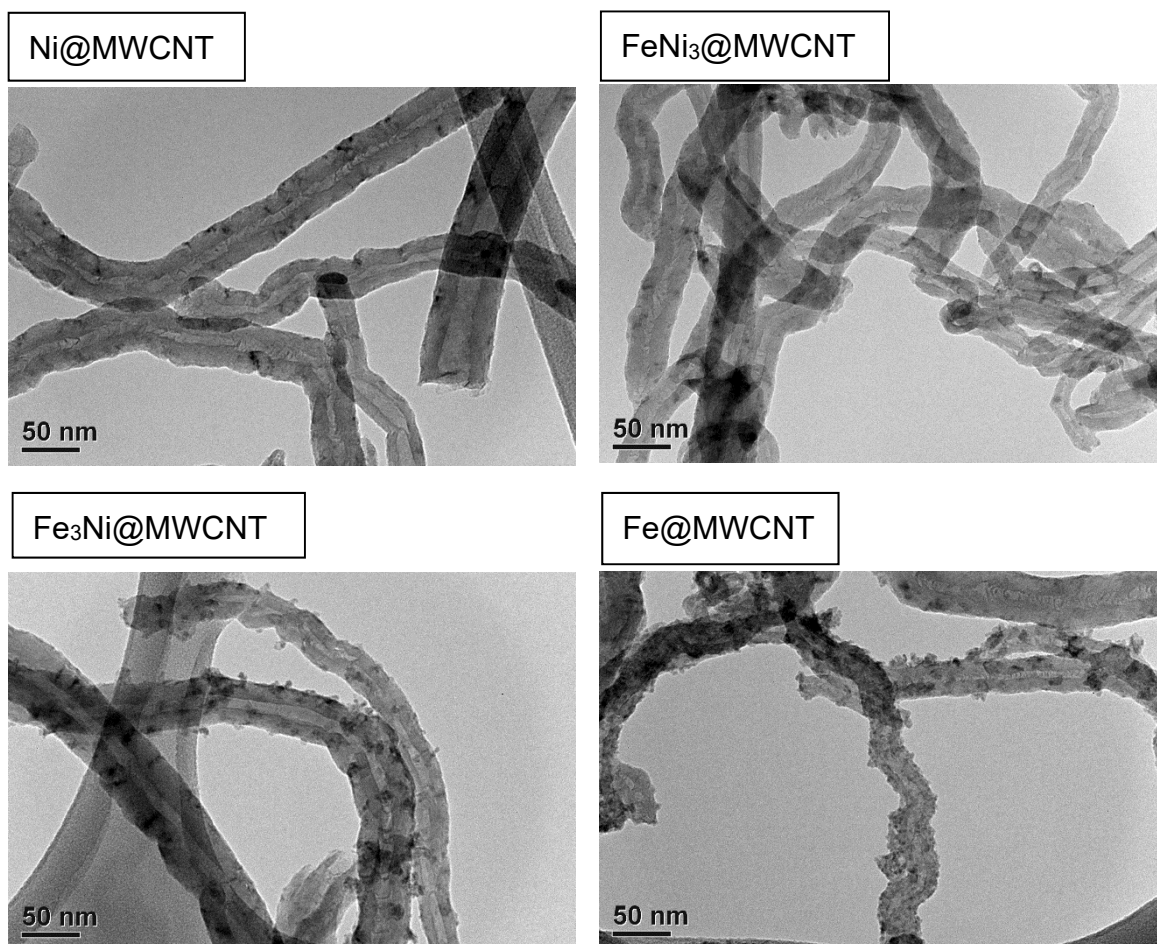

**Fig. S11** TEM images of  $(\text{FeNi})_x\text{@MWCNT}$  including  $\text{Ni@MWCNT}$ ,  $\text{FeNi}_3\text{@MWCNT}$ ,  $\text{Fe}_3\text{Ni@MWCNT}$ , and  $\text{Fe@MWCNT}$ .

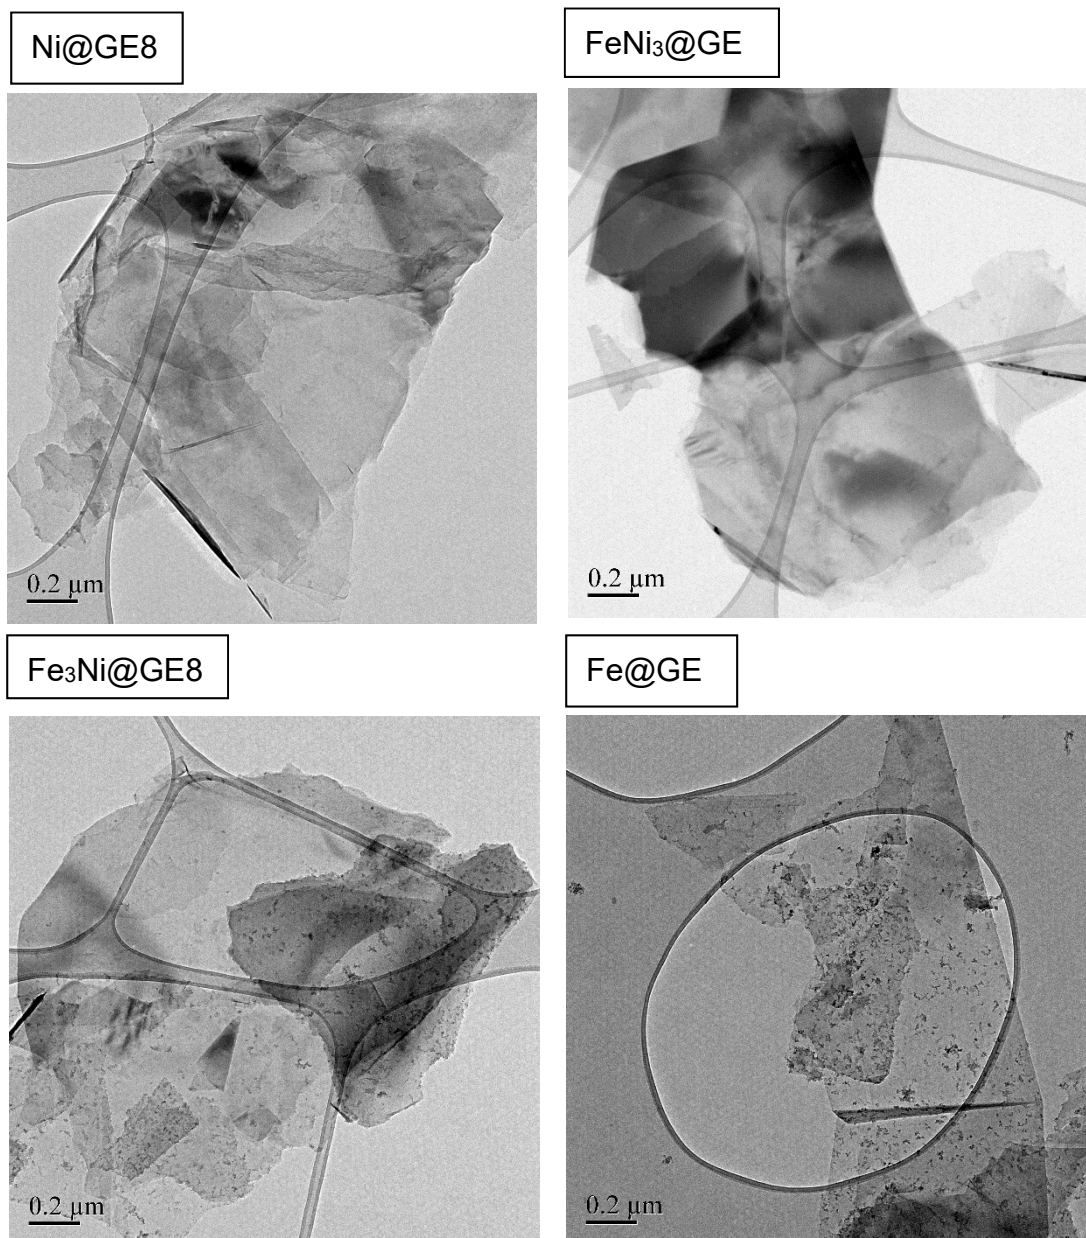

**Fig. S12** TEM images of (FeNi)<sub>x</sub>@GE8 including Ni@GE8, FeNi<sub>3</sub>@GE8, Fe<sub>3</sub>Ni@GE8, and Fe@GE8.

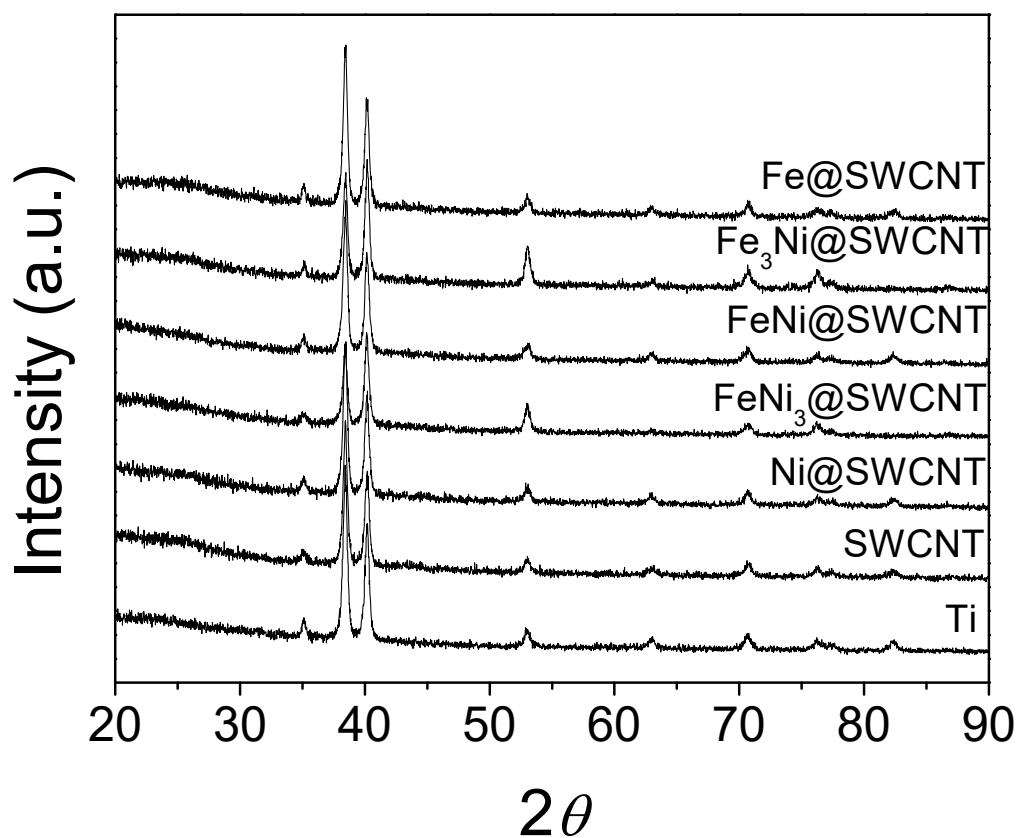

**Fig. 13** X-ray diffraction of (FeNi)<sub>x</sub>@SWCNT on a Ti sample holder.

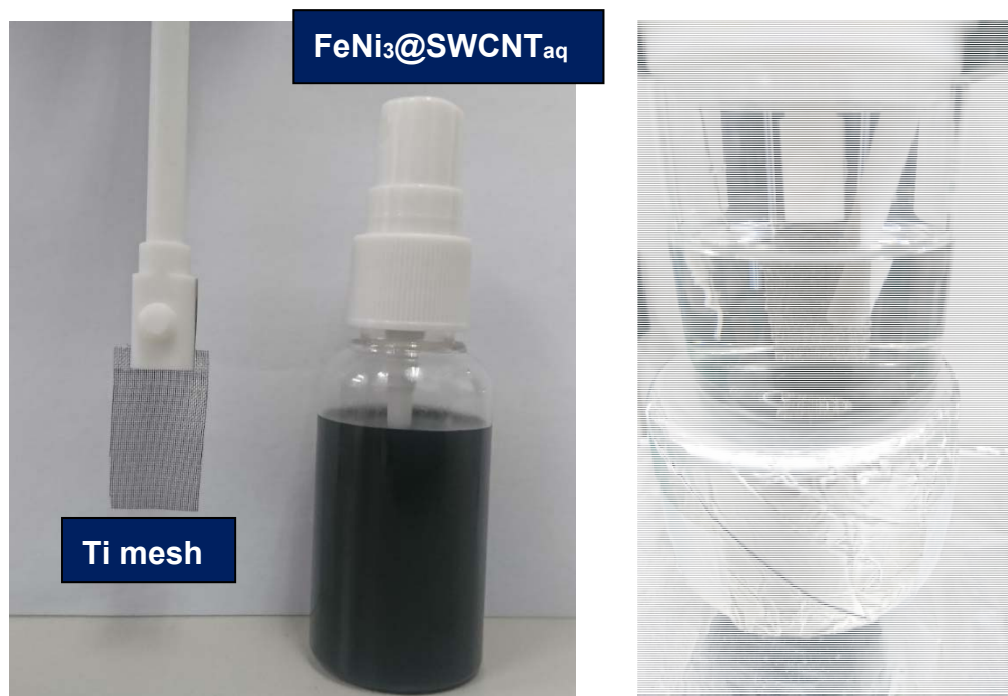

**Fig. S14**  $\text{FeNi}_3\text{@SWCNT}$  ink loaded in a sprayer can homogeneously spray catalysts onto any conducting substrates for OER application.

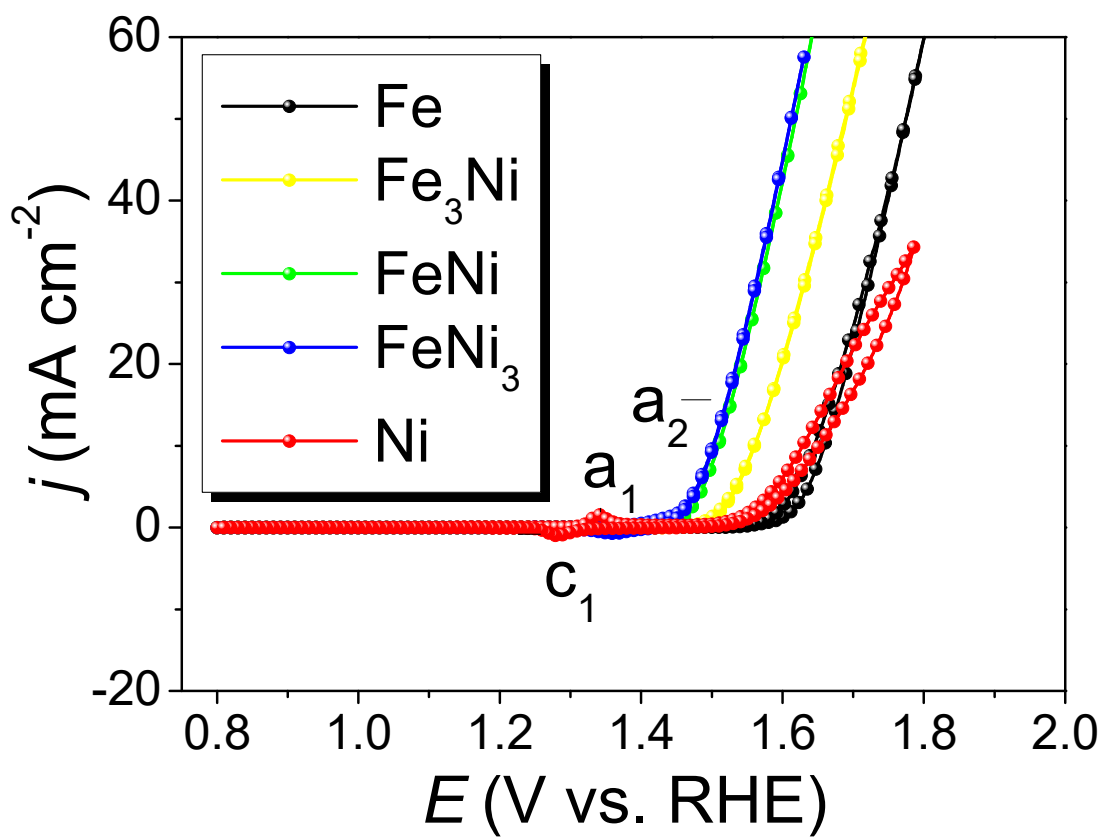

**Fig. S15** OER CVs for the (FeNi)<sub>x</sub>@SWCNT series recorded in 1.0 M KOH with a scan rate of 10 mV/s.



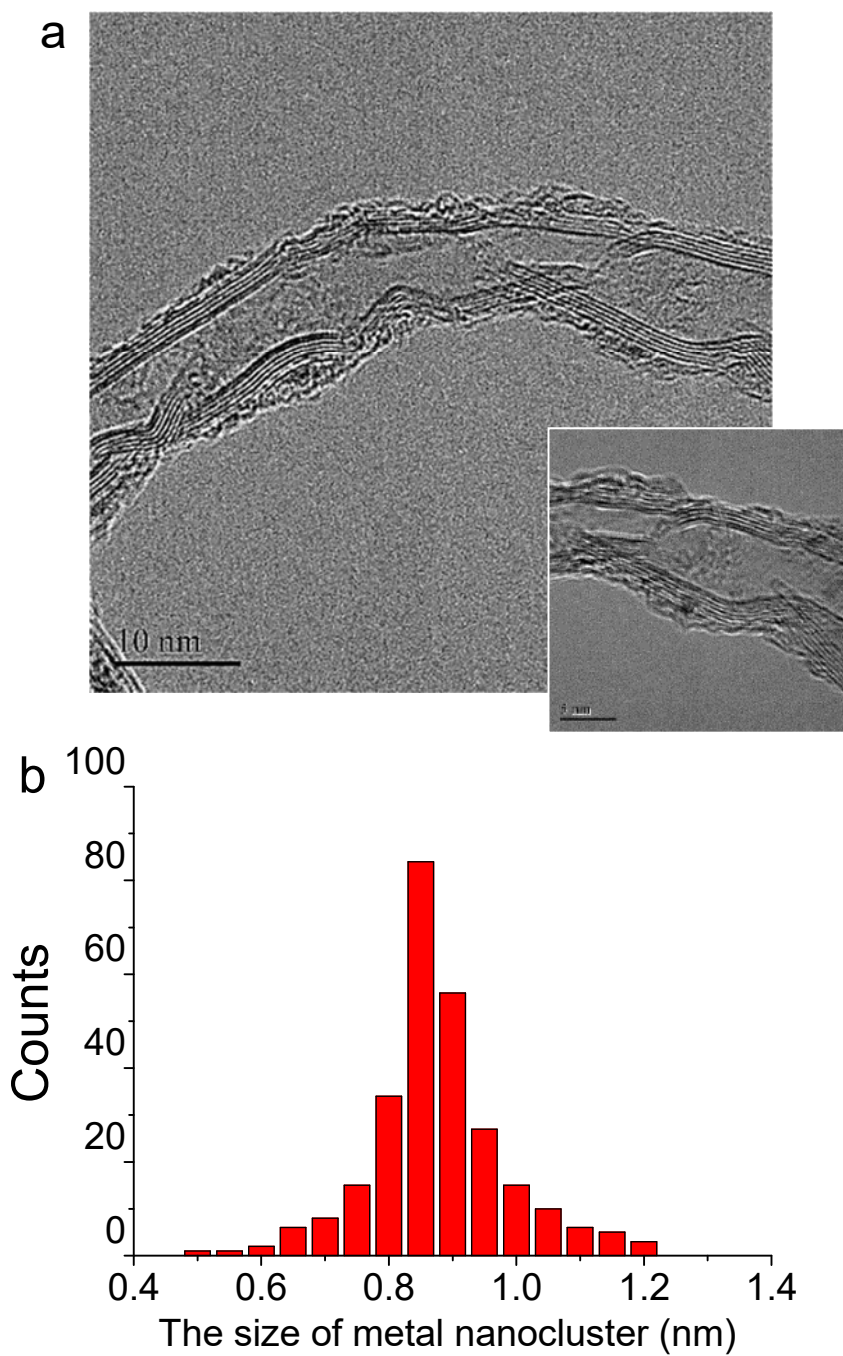

**Fig. S16** HR-TEM images of (a) FeNi<sub>3</sub>@SWCNT and (b) Histograms of metal nanocluster size constructed by counting 200–300 nanoclusters on the SWCNT in TEM images of FeNi<sub>3</sub>@SWCNT

**Table S1.** Comparisons of OER performance for various transition metal-based electrocatalysts.

| Catalyst                                               | Catalyst loading    | TOF             | Tafel slope          | $J_m^*$            | $J_m@η^*$         | $η_{10}^*$ | Refs.     |
|--------------------------------------------------------|---------------------|-----------------|----------------------|--------------------|-------------------|------------|-----------|
|                                                        | mg cm <sup>-2</sup> | s <sup>-1</sup> | mV dec <sup>-1</sup> | A mg <sup>-1</sup> | A g <sup>-1</sup> | V          |           |
| FeNi <sub>3</sub> @SWCNT                               | 0.00042             | 14.03           | 30.2                 | 23.81              | 92249.6@0.3V      | 0.275      |           |
| FeNi@SWCNT                                             | 0.00041             | 8.2             | 31.2                 | 24.39              | 53925.8@0.3V      | 0.280      |           |
| Fe <sub>3</sub> Ni@SWCNT                               | 0.00045             | 1.25            | 35.4                 | 22.22              | 8247.3@0.3V       | 0.329      | this work |
| Fe@SWCNT                                               | 0.00046             | 0.02            | 36.3                 | 21.74              | 0.0066@0.3V       | 0.442      |           |
| Ni@SWCNT                                               | 0.00040             | 0.31            | 46.2                 | 25.00              | 0.86@0.3V         | 0.360      |           |
| Fe <sub>3</sub> Co(PO <sub>4</sub> ) <sub>4</sub> @rGO | 1.0                 | 0.54            | 57                   | 0.01               | 0.54@0.237V       | 0.237      | 27        |
| NiMoN@NiFeN                                            | 1270                | 0.09            | 58.6                 | 0.0079             | 0.163@0.3V        | 0.277      | 28        |
| AN-CuNiFe                                              | 0.025               | 3.3             | 44                   | 0.4                | 1464.5@0.3V       | 0.224      | 26        |
| Au/NiFe LDH                                            | 2                   | 0.11            | 36                   | 0.005              | 64.9@0.28V        | 0.237      | 25        |
| FeP/Ni <sub>2</sub> P                                  | 8                   | 0.16            | 22.7                 | 0.00125            | 159.6@0.3V        | 0.154      | 24        |
| Fe(TCNQ) <sub>2</sub> /Fe                              | 0.49                | N/A             | 110                  | 0.0204             | NA                | 0.340      | 23        |
| Fe-Co-2.3Ni-B                                          | 0.3                 | N/A             | 38                   | 0.0333             | N/A               | 0.274      | 22        |
| Ni <sub>3</sub> Fe <sub>0.5</sub> V <sub>0.5</sub>     | 1.27                | 0.09            | 58.6                 | 0.0079             | 0.163@0.3V        | 0.264      | 21        |
| Fe-NiSe <sub>2</sub>                                   | ~0.2                | 0.071           | 41                   | 0.05               | 124.3@0.29V       | 0.268      | 20        |
| Ni <sub>2</sub> Fe <sub>1</sub> -O                     | 0.15                | N/A             | 39                   | 0.0667             | N/A               | 0.244      | 19        |
| Ni@NC-800                                              | 0.31                | N/A             | 45                   | 0.0323             | N/A               | 0.280      | 18        |
| P-Co <sub>3</sub> O <sub>4</sub>                       | 0.4                 | 0.0158          | 51.6                 | 0.025              | N/A               | 0.280      | 17        |
| Ultrathin CoFe LDHs                                    | 0.2                 | 4.78            | 37.9                 | 0.05               | 190@0.3V          | 0.266      | 42        |
| Ni <sub>45</sub> Fe <sub>55</sub> /XC-72r              | 0.01                | 0.2             | 36                   | 1                  | 2000@0.3V         | N/A        | 37        |
| NiFe-MOF                                               | N/A                 | 3.8             | 34                   | N/A                | N/A               | 0.24       | 15        |

|                                           |       |       |      |        |             |       |    |
|-------------------------------------------|-------|-------|------|--------|-------------|-------|----|
| Gelled FeCoW                              | 0.21  | 0.46  | N/A  | 0.05   | 1175@0.3    | 0.223 | 14 |
| Fe <sub>0.5</sub> V <sub>0.5</sub>        | 0.143 | 0.02  | 36.7 | 0.07   | 6.99@0.292V | 0.39  | 16 |
| CP/CTs/Co-S                               | 0.32  | 0.016 | 72   | 0.0313 | 31.3*0.306  | 0.306 | 29 |
| FeOOH/Co/FeOOH                            | 0.5   | 2.33  | 32   | 0.02   | 40@0.25     | 0.25  | 13 |
| NiFe LDH/GO                               | 0.25  | 0.1   | 42   | 0.04   | 40@0.23     | 0.23  | 11 |
| NiFe-LDH/CNTs                             | 0.2   | 0.56  | 31   | 0.05   | 47.63@0.3   | 0.26  | 10 |
| Ni <sub>0.75</sub> V <sub>0.25</sub> -LDH | 0.143 | 0.054 | 50   | 0.07   | 70@0.35     | 0.35  | 12 |

---

\*  $J_m$ : Mass activity at 10 mA cm<sup>-2</sup><sub>geo</sub>;  $J_m@η$ : Mass activity @specific  $η$ ;  $η_{10}$ : Overpotential for 10 mA cm<sup>-2</sup><sub>geo</sub>
